# Supplementary material for: The modulation effect of carboxylic acid ligands on the electron transfer photochromism of NDI-derived coordination polymers
Source: Royal Society of Chemistry journal article supplement (doi:10.1039/d1dt02358f), 2021-01-01
Supplement: d1dt02358f1.pdf [file d1dt02358f1.pdf]

Electronic Supplementary Material (ESI) for Dalton Transactions.

This journal is © The Royal Society of Chemistry 2021

## The modulation effect of carboxylic acid ligands on the electron transfer photochromism of naphthalene diimide-derived coordination polymers

Gao-Peng Li<sup>†</sup>, Huihui Zhu<sup>†</sup>, Pengfei Hao,<sup>\*</sup> Junju Shen and Yunlong Fu<sup>\*</sup>

*Key Laboratory of Magnetic Molecules & Magnetic Information Materials Ministry of Education, School of Chemical and Material Science, Shanxi Normal University, Linfen 041004, China*

### Supplementary Information Contents

|                                                                                                                                                                             |   |
|-----------------------------------------------------------------------------------------------------------------------------------------------------------------------------|---|
| <b>1. Figures</b> .....                                                                                                                                                     | 2 |
| <b>Fig. S1</b> PXRD patterns of <b>1-4</b> simulated from the X-ray single-crystal structures, as-synthesized samples and after irradiation samples.....                    | 2 |
| <b>Fig. S2</b> TGA curves of <b>1-4</b> . .....                                                                                                                             | 2 |
| <b>Fig. S3</b> FT-IR spectra of <b>1-4</b> . .....                                                                                                                          | 3 |
| <b>Fig. S4</b> The switching cycles of coloration-decoloration processes of <b>1</b> (a) and <b>2</b> (b) upon alternating UV light illumination and thermal treatment..... | 3 |
| <b>Fig. S5</b> (a) UV-vis spectra of complexes <b>1-4</b> and (b) Kubelka-Munk transformed reflectivity vs energy of complexes <b>1-4</b> . .....                           | 3 |
| <b>Fig. S6</b> C 1s (a-d) and Cd 3d (e-h) XPS core-level spectra of <b>1-4</b> and <b>1P-4P</b> . .....                                                                     | 4 |
| <b>2. Tables</b> .....                                                                                                                                                      | 5 |
| <b>Table S1</b> . Crystallographic data and refinement of complexes <b>1-4</b> . .....                                                                                      | 5 |
| <b>Table S2</b> . Selected bond lengths (Å) and angles (°) for complexes <b>1-4</b> .....                                                                                   | 6 |
| <b>Table S3</b> . Hydrogen bonds of for complexes <b>1-4</b> (Å and °). .....                                                                                               | 8 |
| <b>Table S4</b> . Photochromic kinetic parameters at room temperature of <b>1-2</b> . .....                                                                                 | 9 |

## 1. Figures

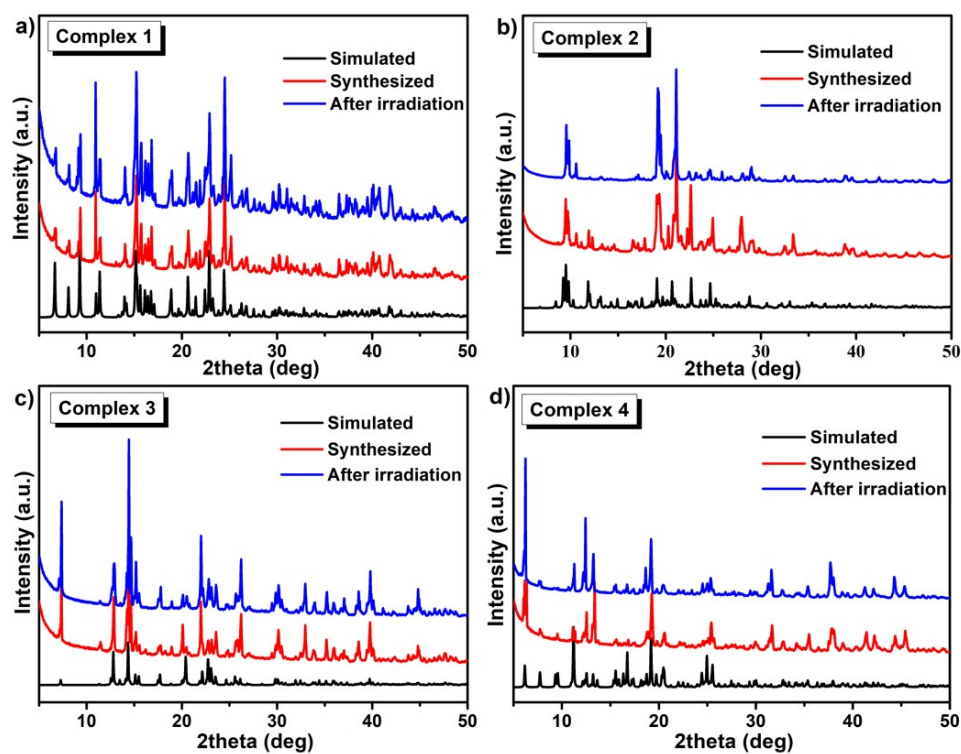

**Fig. S1** PXR D patterns of **1-4** simulated from the X-ray single-crystal structures, as-synthesized samples and after irradiation samples.

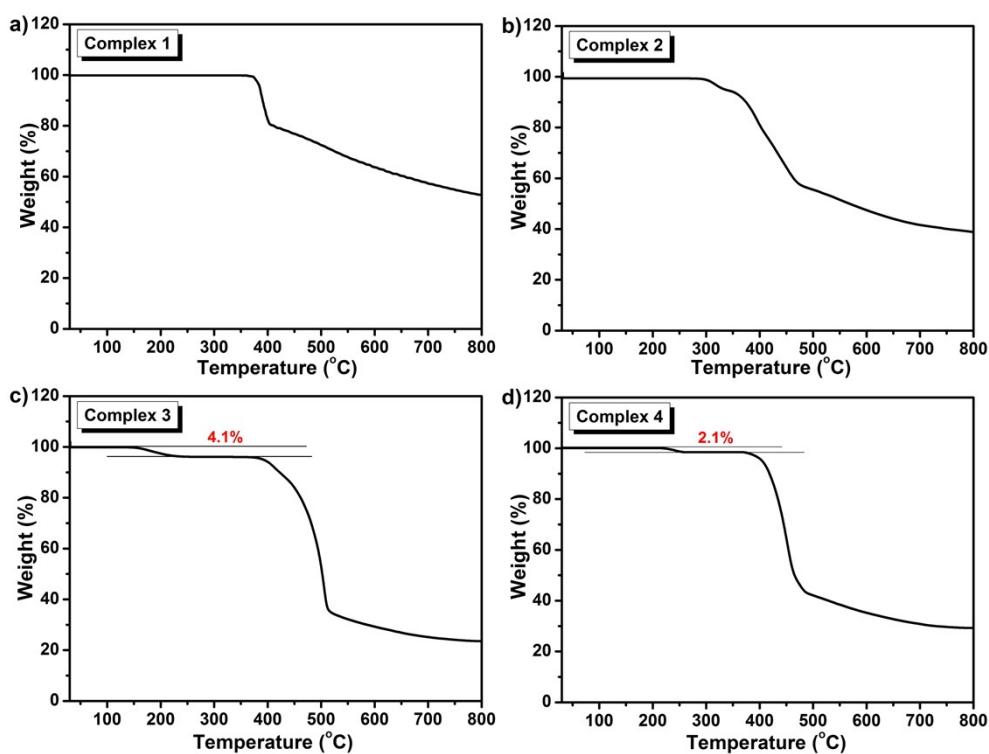

**Fig. S2** TGA curves of **1-4**.

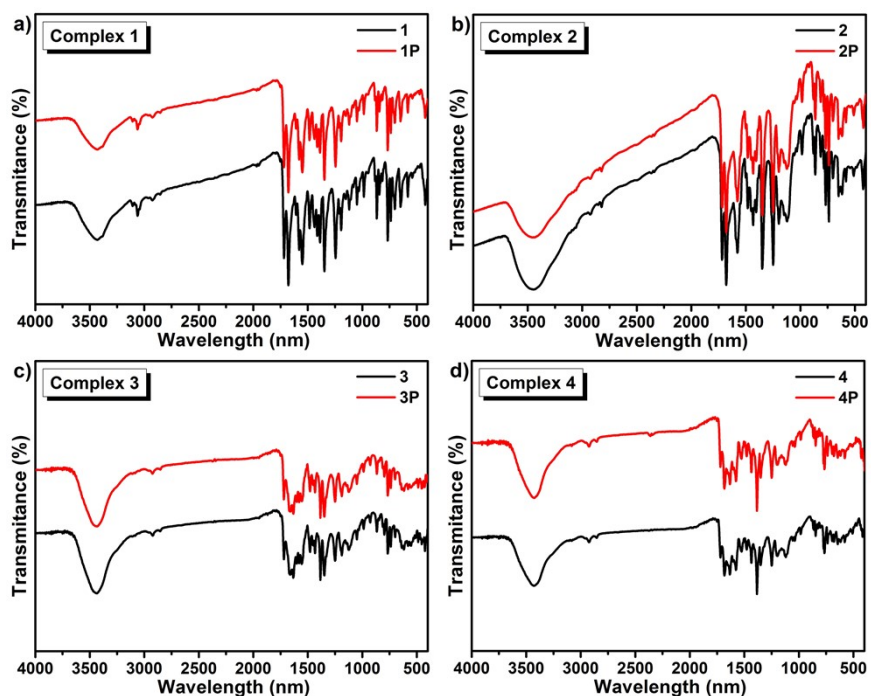

**Fig. S3** FT-IR spectra of **1-4**.

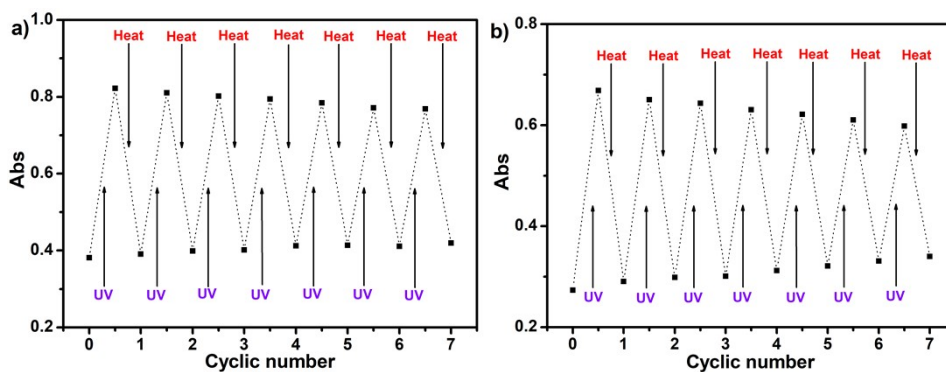

**Fig. S4** The switching cycles of coloration-decoloration processes of **1** (a) and **2** (b) upon alternating UV light illumination and thermal treatment.

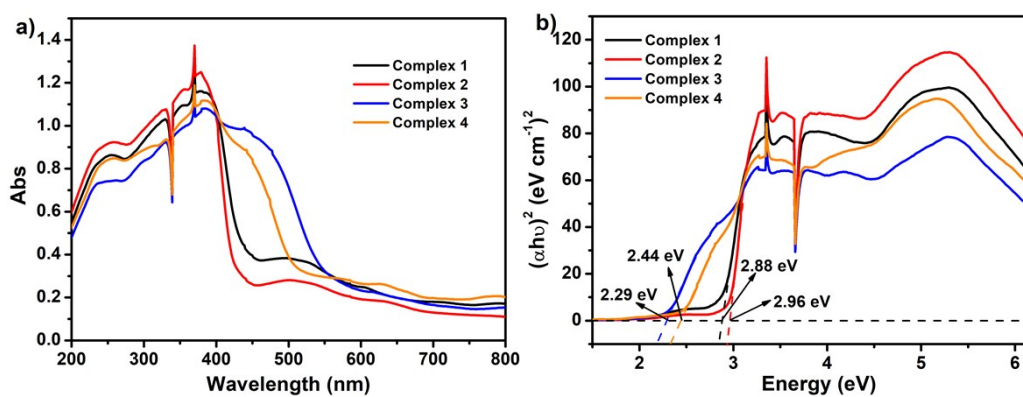

**Fig. S5** (a) UV-vis spectra of complexes **1-4** and (b) Kubelka-Munk transformed reflectivity vs energy of complexes **1-4**.

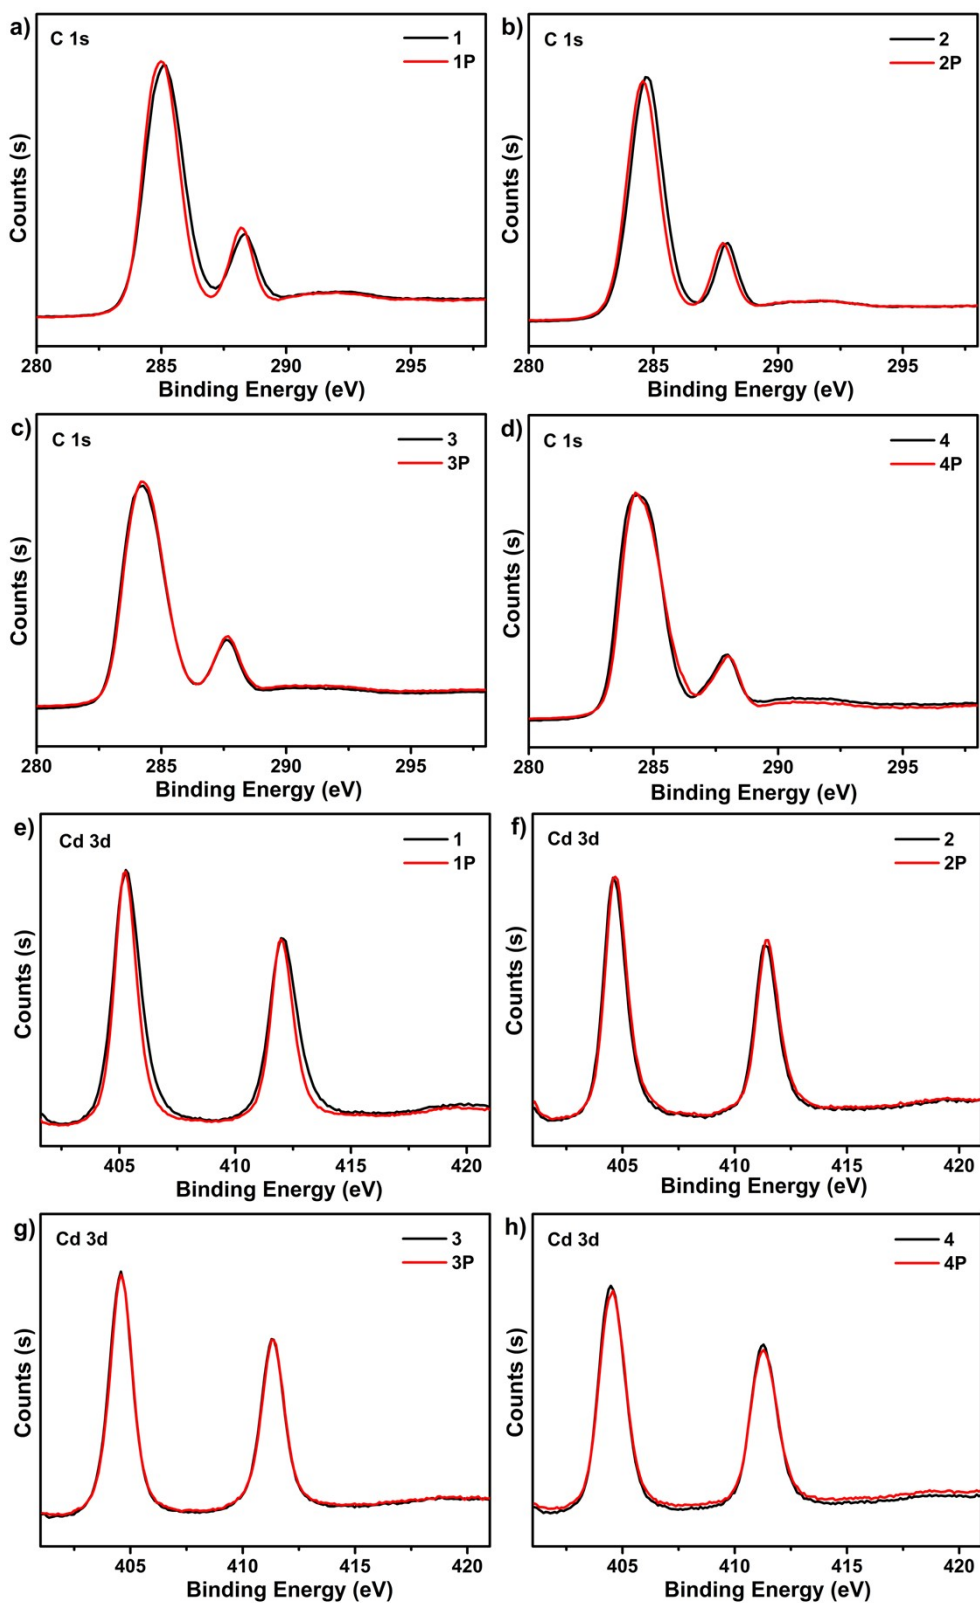

**Fig. S6** C 1s (a-d) and Cd 3d (e-h) XPS core-level spectra of **1-4** and **1P-4P**.

## 2. Tables

**Table S1.** Crystallographic data and refinement of complexes **1-4**.

| Complex                                                                                               | <b>1</b>                                                        | <b>2</b>                                                         | <b>3</b>                                                                        | <b>4</b>                                                        |
|-------------------------------------------------------------------------------------------------------|-----------------------------------------------------------------|------------------------------------------------------------------|---------------------------------------------------------------------------------|-----------------------------------------------------------------|
| CCDC number                                                                                           | 2095774                                                         | 2095775                                                          | 2095776                                                                         | 2095777                                                         |
| Formula                                                                                               | C <sub>32</sub> H <sub>16</sub> CdN <sub>4</sub> O <sub>8</sub> | C <sub>56</sub> H <sub>28</sub> CdN <sub>9</sub> O <sub>15</sub> | C <sub>18</sub> H <sub>11</sub> Cd <sub>0.5</sub> N <sub>2</sub> O <sub>5</sub> | C <sub>38</sub> H <sub>22</sub> CdN <sub>4</sub> O <sub>9</sub> |
| <i>M</i> (g mol <sup>-1</sup> )                                                                       | 696.89                                                          | 1179.27                                                          | 391.49                                                                          | 790.99                                                          |
| Crystal system                                                                                        | Triclinic                                                       | Triclinic                                                        | Triclinic                                                                       | Orthorhombic                                                    |
| Space group                                                                                           | <i>P</i> -1                                                     | <i>P</i> -1                                                      | <i>P</i> -1                                                                     | <i>Pbca</i>                                                     |
| <i>a</i> (Å)                                                                                          | 9.0370(8)                                                       | 10.1715(7)                                                       | 7.8636(2)                                                                       | 18.933(6)                                                       |
| <i>b</i> (Å)                                                                                          | 11.9459(11)                                                     | 13.7543(10)                                                      | 8.6510(3)                                                                       | 11.390(4)                                                       |
| <i>c</i> (Å)                                                                                          | 14.2200(13)                                                     | 18.1085(13)                                                      | 12.3167(3)                                                                      | 28.638(9)                                                       |
| $\alpha$ (deg)                                                                                        | 72.514(2)                                                       | 87.319(2)                                                        | 92.507(2)                                                                       | 90                                                              |
| $\beta$ (deg)                                                                                         | 73.088(2)                                                       | 84.683(2)                                                        | 97.146(2)                                                                       | 90                                                              |
| $\gamma$ (deg)                                                                                        | 69.414(2)                                                       | 70.671(2)                                                        | 114.756(3)                                                                      | 90                                                              |
| <i>V</i> (Å <sup>3</sup> )                                                                            | 1340.9(2)                                                       | 2380.0(3)                                                        | 750.69(4)                                                                       | 6175(4)                                                         |
| <i>Z</i>                                                                                              | 2                                                               | 2                                                                | 2                                                                               | 8                                                               |
| <i>D</i> <sub>c</sub> (g cm <sup>-3</sup> )                                                           | 1.726                                                           | 1.646                                                            | 1.732                                                                           | 1.702                                                           |
| $\mu$ (mm <sup>-1</sup> )                                                                             | 0.879                                                           | 0.547                                                            | 6.458                                                                           | 0.777                                                           |
| Reflns collected/unique                                                                               | 19308/6577                                                      | 43793/11777                                                      | 5918/2606                                                                       | 36229/7144                                                      |
| <i>R</i> <sub>int</sub>                                                                               | 0.0177                                                          | 0.0274                                                           | 0.0351                                                                          | 0.0317                                                          |
| GOF                                                                                                   | 1.063                                                           | 1.055                                                            | 1.059                                                                           | 1.020                                                           |
| <i>R</i> <sub>1</sub> <sup>a</sup> , <i>wR</i> <sub>2</sub> <sup>b</sup> [ <i>I</i> > 2σ( <i>I</i> )] | 0.0226/0.0609                                                   | 0.0346/0.072<br>7                                                | 0.0341/0.086<br>2                                                               | 0.0324/0.0728                                                   |
| <i>R</i> <sub>1</sub> , <i>wR</i> <sub>2</sub> (all data)                                             | 0.0242/0.0618                                                   | 0.0476/0.077<br>8                                                | 0.0343/0.086<br>5                                                               | 0.0528/0.0820                                                   |

$$^a R_1 = \sum ||F_o| - |F_c|| / \sum |F_o|; \quad ^b wR_2 = [\sum w(F_o^2 - F_c^2)^2 / \sum w(F_o^2)^2]^{1/2}$$

**Table S2.** Selected bond lengths (Å) and angles (°) for complexes **1-4**.

| <b>Complex 1</b>                                                          |            |                     |            |
|---------------------------------------------------------------------------|------------|---------------------|------------|
| Cd(1)-O(4)#1                                                              | 2.2825(14) | Cd(1)-N(1)          | 2.2982(13) |
| Cd(1)-O(1)                                                                | 2.1934(13) | Cd(1)-O(3)#1        | 2.4618(15) |
| Cd(1)-N(3)                                                                | 2.2770(14) | Cd(1)-C(8)#1        | 2.6917(17) |
| O(4)-Cd(1)#1                                                              | 2.2825(14) | O(3)-Cd(1)#1        | 2.4618(15) |
| C(8)-Cd(1)#1                                                              | 2.6917(17) |                     |            |
| O(4)#1-Cd(1)-N(1)                                                         | 86.93(5)   | O(4)#1-Cd(1)-O(3)#1 | 55.05(5)   |
| O(4)#1-Cd(1)-C(8)#1                                                       | 27.71(5)   | N(1)-Cd(1)-O(3)#1   | 141.83(5)  |
| N(1)-Cd(1)-C(8)#1                                                         | 114.63(5)  | O(1)-Cd(1)-O(4)#1   | 111.78(6)  |
| O(1)-Cd(1)-N(1)                                                           | 100.16(5)  | O(1)-Cd(1)-O(3)#1   | 97.51(5)   |
| O(1)-Cd(1)-N(3)                                                           | 118.79(6)  | O(1)-Cd(1)-C(8)#1   | 104.28(5)  |
| O(3)#1-Cd(1)-C(8)#1                                                       | 27.50(5)   | N(3)-Cd(1)-O(4)#1   | 114.38(5)  |
| N(3)-Cd(1)-N(1)                                                           | 119.96(5)  | N(3)-Cd(1)-O(3)#1   | 78.82(5)   |
| N(3)-Cd(1)-C(8)#1                                                         | 98.67(5)   |                     |            |
| Symmetry codes: #1: -x+1, -y+1, -z; #2: -x, -y, -z+1; #3 -x+2, -y+1, -z+1 |            |                     |            |
| <b>Complex 2</b>                                                          |            |                     |            |
| Cd(1)-O(10)                                                               | 2.3787(16) | Cd(1)-O(14)         | 2.5170(16) |
| Cd(1)-O(9)                                                                | 2.4142(15) | Cd(1)-N(5)          | 2.3039(17) |
| Cd(1)-N(1)                                                                | 2.3622(17) | Cd(1)-N(7)          | 2.3357(17) |
| Cd(1)-O(13)                                                               | 2.5474(18) | Cd(1)-C(49)         | 2.7301(19) |
| O(10)-Cd(1)-O(14)                                                         | 165.72(5)  | O(10)-Cd(1)-O(9)    | 54.17(5)   |
| O(10)-Cd(1)-O(13)                                                         | 143.30(5)  | O(10)-Cd(1)-C(49)   | 27.14(6)   |
| O(14)-Cd(1)-O(13)                                                         | 50.34(5)   | O(14)-Cd(1)-C(49)   | 167.04(6)  |
| O(9)-Cd(1)-O(14)                                                          | 140.11(5)  | O(9)-Cd(1)-O(13)    | 90.70(5)   |
| O(9)-Cd(1)-C(49)                                                          | 27.17(6)   | N(5)-Cd(1)-O(10)    | 101.69(6)  |
| N(5)-Cd(1)-O(14)                                                          | 80.62(6)   | N(5)-Cd(1)-O(9)     | 90.76(6)   |
| N(5)-Cd(1)-N(1)                                                           | 97.58(6)   | N(5)-Cd(1)-N(7)     | 163.08(6)  |
| N(5)-Cd(1)-O(13)                                                          | 87.52(6)   | N(5)-Cd(1)-C(49)    | 98.96(6)   |
| N(1)-Cd(1)-O(10)                                                          | 82.47(5)   | N(1)-Cd(1)-O(14)    | 83.25(5)   |
| N(1)-Cd(1)-O(9)                                                           | 136.63(6)  | N(1)-Cd(1)-O(13)    | 131.95(6)  |
| N(1)-Cd(1)-C(49)                                                          | 109.58(6)  | N(7)-Cd(1)-O(10)    | 92.76(6)   |
| N(7)-Cd(1)-O(14)                                                          | 87.54(5)   | N(7)-Cd(1)-O(9)     | 90.65(6)   |
| N(7)-Cd(1)-N(1)                                                           | 92.94(6)   | N(7)-Cd(1)-O(13)    | 75.60(6)   |
| N(7)-Cd(1)-C(49)                                                          | 89.88(6)   | O(13)-Cd(1)-C(49)   | 116.75(6)  |
| Symmetry codes: #1 -x-1, -y+2, -z+1; #2 -x+1, -y, -z+2                    |            |                     |            |
| <b>Complex 3</b>                                                          |            |                     |            |
| Cd(1)-O(3)#1                                                              | 2.264(2)   | Cd(1)-O(3)          | 2.264(2)   |
| Cd(1)-O(5)#1                                                              | 2.346(2)   | Cd(1)-O(5)          | 2.346(2)   |

|                                                                       |            |                     |            |
|-----------------------------------------------------------------------|------------|---------------------|------------|
| Cd(1)-N(1)                                                            | 2.348(3)   | Cd(1)-N(1)#1        | 2.348(3)   |
| O(3)#1-Cd(1)-O(3)                                                     | 180.00(12) | O(3)-Cd(1)-O(5)     | 91.10(9)   |
| O(3)-Cd(1)-O(5)#1                                                     | 88.90(9)   | O(3)#1-Cd(1)-O(5)   | 88.90(9)   |
| O(3)#1-Cd(1)-O(5)#1                                                   | 91.10(9)   | O(3)-Cd(1)-N(1)#1   | 88.50(9)   |
| O(3)-Cd(1)-N(1)                                                       | 91.50(9)   | O(3)#1-Cd(1)-N(1)   | 88.50(9)   |
| O(3)#1-Cd(1)-N(1)#1                                                   | 91.50(9)   | O(5)-Cd(1)-O(5)#1   | 180.00(13) |
| O(5)-Cd(1)-N(1)#1                                                     | 87.89(9)   | O(5)#1-Cd(1)-N(1)   | 87.89(9)   |
| O(5)-Cd(1)-N(1)                                                       | 92.11(9)   | O(5)#1-Cd(1)-N(1)#1 | 92.11(9)   |
| N(1)#1-Cd(1)-N(1)                                                     | 180.0      |                     |            |
| Symmetry codes: #1 -x, -y, -z+1; #2 -x+2, -y+1, -z+2; #3 -x-1, -y, -z |            |                     |            |
| <b>Complex 4</b>                                                      |            |                     |            |
| Cd(1)-O(8)#1                                                          | 2.4075(19) | Cd(1)-O(9)          | 2.310(2)   |
| Cd(1)-O(7)#1                                                          | 2.508(2)   | Cd(1)-O(5)          | 2.400(2)   |
| Cd(1)-O(6)                                                            | 2.499(2)   | Cd(1)-N(1)          | 2.339(2)   |
| Cd(1)-N(4)#2                                                          | 2.340(2)   | O(8)-Cd(1)#2        | 2.4075(19) |
| O(7)-Cd(1)#2                                                          | 2.508(2)   | N(4)-Cd(1)#1        | 2.340(2)   |
| O(8)#1-Cd(1)-O(7)#1                                                   | 53.01(6)   | O(8)#1-Cd(1)-O(6)   | 141.19(7)  |
| O(9)-Cd(1)-O(8)#1                                                     | 134.54(7)  | O(9)-Cd(1)-O(7)#1   | 81.57(6)   |
| O(9)-Cd(1)-O(5)                                                       | 137.14(7)  | O(9)-Cd(1)-O(6)     | 84.11(7)   |
| O(9)-Cd(1)-N(1)                                                       | 95.20(7)   | O(5)-Cd(1)-O(7)#1   | 141.02(6)  |
| O(9)-Cd(1)-N(4)#2                                                     | 87.59(8)   | O(5)-Cd(1)-O(6)     | 53.13(7)   |
| O(5)-Cd(1)-O(8)#1                                                     | 88.07(7)   | O(6)-Cd(1)-O(7)#1   | 165.59(7)  |
| N(1)-Cd(1)-O(7)#1                                                     | 91.51(7)   | N(1)-Cd(1)-O(8)#1   | 88.57(7)   |
| N(1)-Cd(1)-O(5)                                                       | 89.36(7)   | N(1)-Cd(1)-N(4)#2   | 177.21(7)  |
| N(1)-Cd(1)-O(6)                                                       | 91.44(7)   | N(4)#2-Cd(1)-O(8)#1 | 89.47(7)   |
| N(4)#2-Cd(1)-O(7)#1                                                   | 88.89(7)   | N(4)#2-Cd(1)-O(6)   | 88.85(7)   |
| N(4)#2-Cd(1)-O(5)                                                     | 88.59(7)   |                     |            |
| Symmetry codes: #1: -x+3/2, -y+1, z-1/2; #2: -x+3/2, -y+1, z+1/2      |            |                     |            |

**Table S3.** Hydrogen bonds of for complexes **1-4** (Å and °).

| <b>Complex 1</b>    |        |          |          |        |
|---------------------|--------|----------|----------|--------|
| D-H...A             | d(D-H) | d(H...A) | d(D...A) | <(DHA) |
| C(9)-H(9)...O(4)    | 0.93   | 2.48     | 3.081(2) | 123    |
| C(9)-H(9)...O(5)    | 0.93   | 2.51     | 3.195(2) | 130    |
| C(10)-H(10)...O(3)  | 0.93   | 2.57     | 3.306(3) | 136    |
| C(11)-H(11)...O(1)  | 0.93   | 2.45     | 3.376(3) | 171    |
| C(13)-H(13)...O(2)  | 0.93   | 2.36     | 3.102(3) | 136    |
| C(25)-H(25)...O(2)  | 0.93   | 2.54     | 3.255(2) | 134    |
| C(25)-H(25)...O(6)  | 0.93   | 2.55     | 3.236(2) | 131    |
| <b>Complex 2</b>    |        |          |          |        |
| D-H...A             | d(D-H) | d(H...A) | d(D...A) | <(DHA) |
| C(1)-H(1)...O(10)   | 0.93   | 2.28     | 2.978(3) | 132    |
| C(3)-H(3)...O(9)    | 0.93   | 2.45     | 3.336(3) | 159    |
| C(5)-H(5)...O(12)   | 0.93   | 2.60     | 3.355(3) | 139    |
| C(5)-H(5)...O(14)   | 0.93   | 2.41     | 3.105(3) | 132    |
| C(12)-H(12)...O(5)  | 0.93   | 2.55     | 3.134(3) | 121    |
| C(16)-H(16)...O(3)  | 0.93   | 2.38     | 3.078(3) | 131    |
| C(27)-H(27)...O(10) | 0.93   | 2.56     | 3.254(3) | 132    |
| C(29)-H(29)...O(14) | 0.93   | 2.50     | 3.048(3) | 118    |
| C(39)-H(39)...O(15) | 0.93   | 2.55     | 3.440(3) | 160    |
| C(52)-H(52)...O(4)  | 0.93   | 2.57     | 3.416(3) | 152    |
| <b>Complex 3</b>    |        |          |          |        |
| D-H...A             | d(D-H) | d(H...A) | d(D...A) | <(DHA) |
| O(5)-H(5A)...O(4)   | 0.85   | 1.92     | 2.679(4) | 148    |
| O(5)-H(5B)...O(2)   | 0.85   | 2.09     | 2.906(4) | 161    |
| C(5)-H(5)...O(3)    | 0.93   | 2.55     | 3.186(4) | 126    |
| C(17)-H(17)...O(4)  | 0.93   | 2.59     | 3.478(5) | 161    |
| <b>Complex 4</b>    |        |          |          |        |
| D-H...A             | d(D-H) | d(H...A) | d(D...A) | <(DHA) |
| O(9)-H(9A)...O(8)   | 0.85   | 1.94     | 2.747(3) | 156    |
| O(9)-H(9B)...O(5)   | 0.85   | 2.08     | 2.831(3) | 146    |
| C(3)-H(3)...O(3)    | 0.93   | 2.59     | 3.215(3) | 125    |
| C(11)-H(11)...O(1)  | 0.93   | 2.35     | 3.262(3) | 167    |
| C(22)-H(22)...O(4)  | 0.93   | 2.57     | 3.095(3) | 116    |
| C(23)-H(23)...O(4)  | 0.93   | 2.51     | 3.083(3) | 120    |



**Table S4.** Photochromic kinetic parameters at room temperature of **1-2**.

| Complex | $A_0$   | $A_1$    | $k_1$ (s <sup>-1</sup> ) | $k_2$ (s <sup>-1</sup> ) | $R$     |
|---------|---------|----------|--------------------------|--------------------------|---------|
| 1       | 0.81491 | -0.20712 | 0.00226                  | 0.03522                  | 0.99201 |
| 2       | 0.67026 | -0.19431 | 0.0239                   | 0.00108                  | 0.9888  |
